# Supplementary material for: Modeling laser induced molecule excitation using real-time time-dependent density functional theory: application to 5- and 6-benzyluracil
Source: Royal Society of Chemistry journal article supplement (doi:10.1039/c4cp03869j), 2015-01-01
Supplement: c4cp03869j1.pdf [file c4cp03869j1.pdf]

Electronic Supplementary Information

**Modeling laser induced molecule excitation using real-time time-dependent density functional theory: Application to 5- and 6-benzyluracil**

*Attila Bende<sup>\*</sup> and Valer Toşa*

*Molecular and Biomolecular Physics Department, National Institute for Research and Development of Isotopic and Molecular Technologies, Donat Street, No. 67-103, Ro-400293 Cluj-Napoca, Romania.*

<sup>\*</sup>E-mail: [bende@itim-cj.ro](mailto:bende@itim-cj.ro), Phone: 0040-(0)-264-584037 ext. 194.

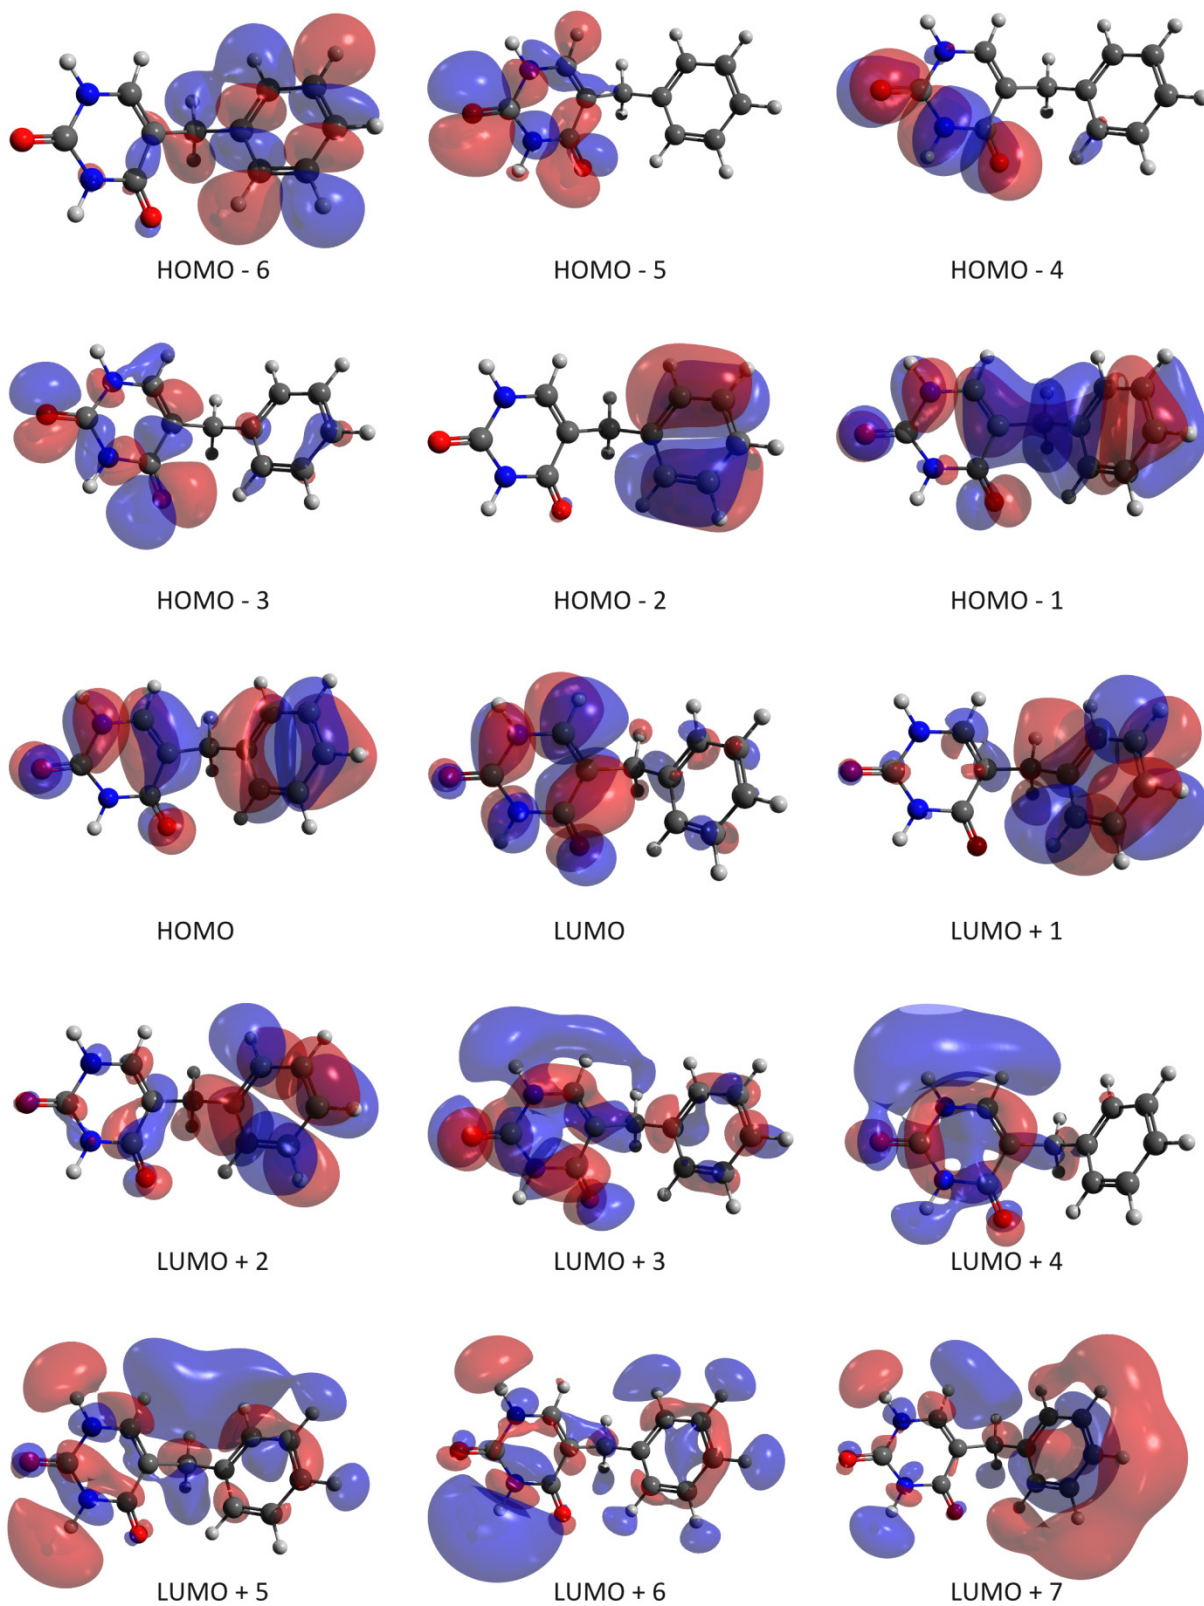

**Figure S1.** The orbital shapes of the last seven occupied and first eight unoccupied orbitals of the 5BU system.

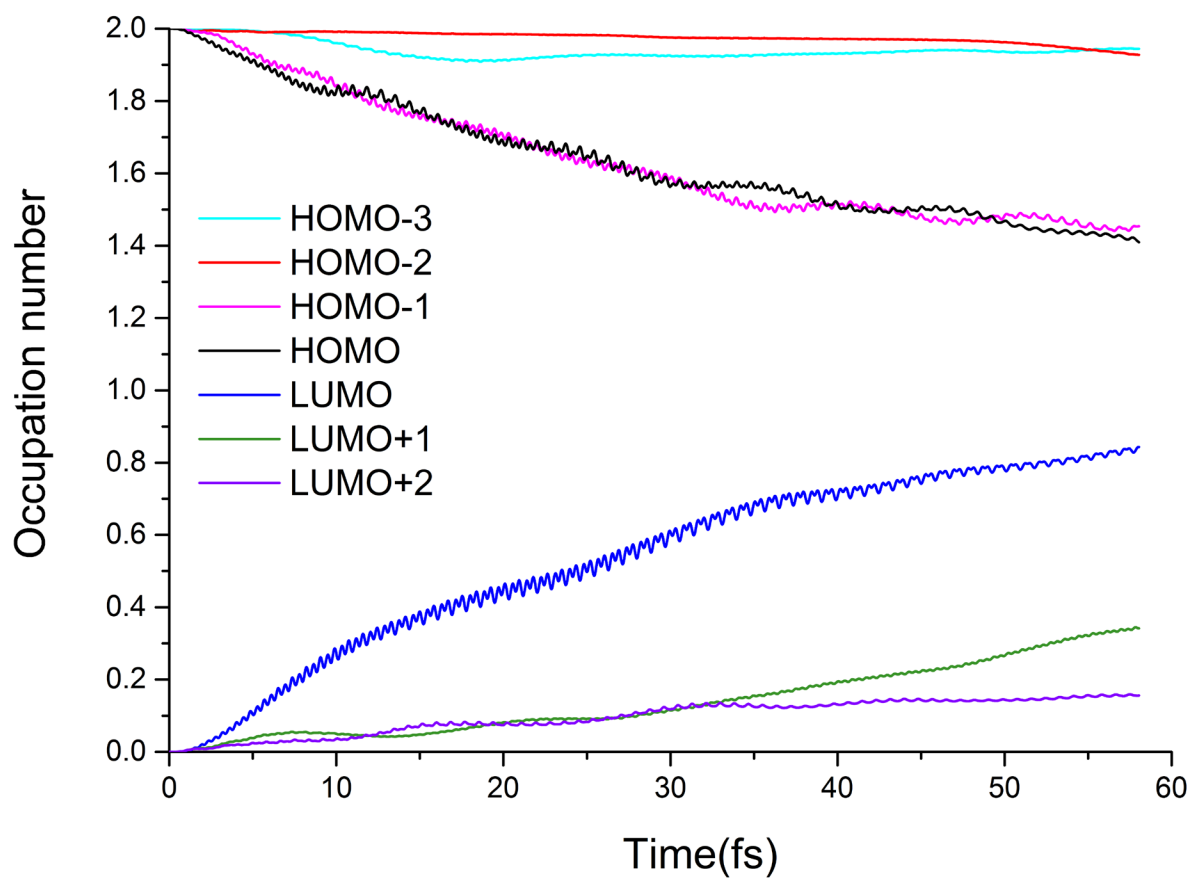

**Figure S2.** From HOMO-3 to HOMO occupied and from LUMO to LUMO+2 virtual orbital's population induced by a laser field applied in the Z directions with 60 fs pulse duration in the case of 5BU system.

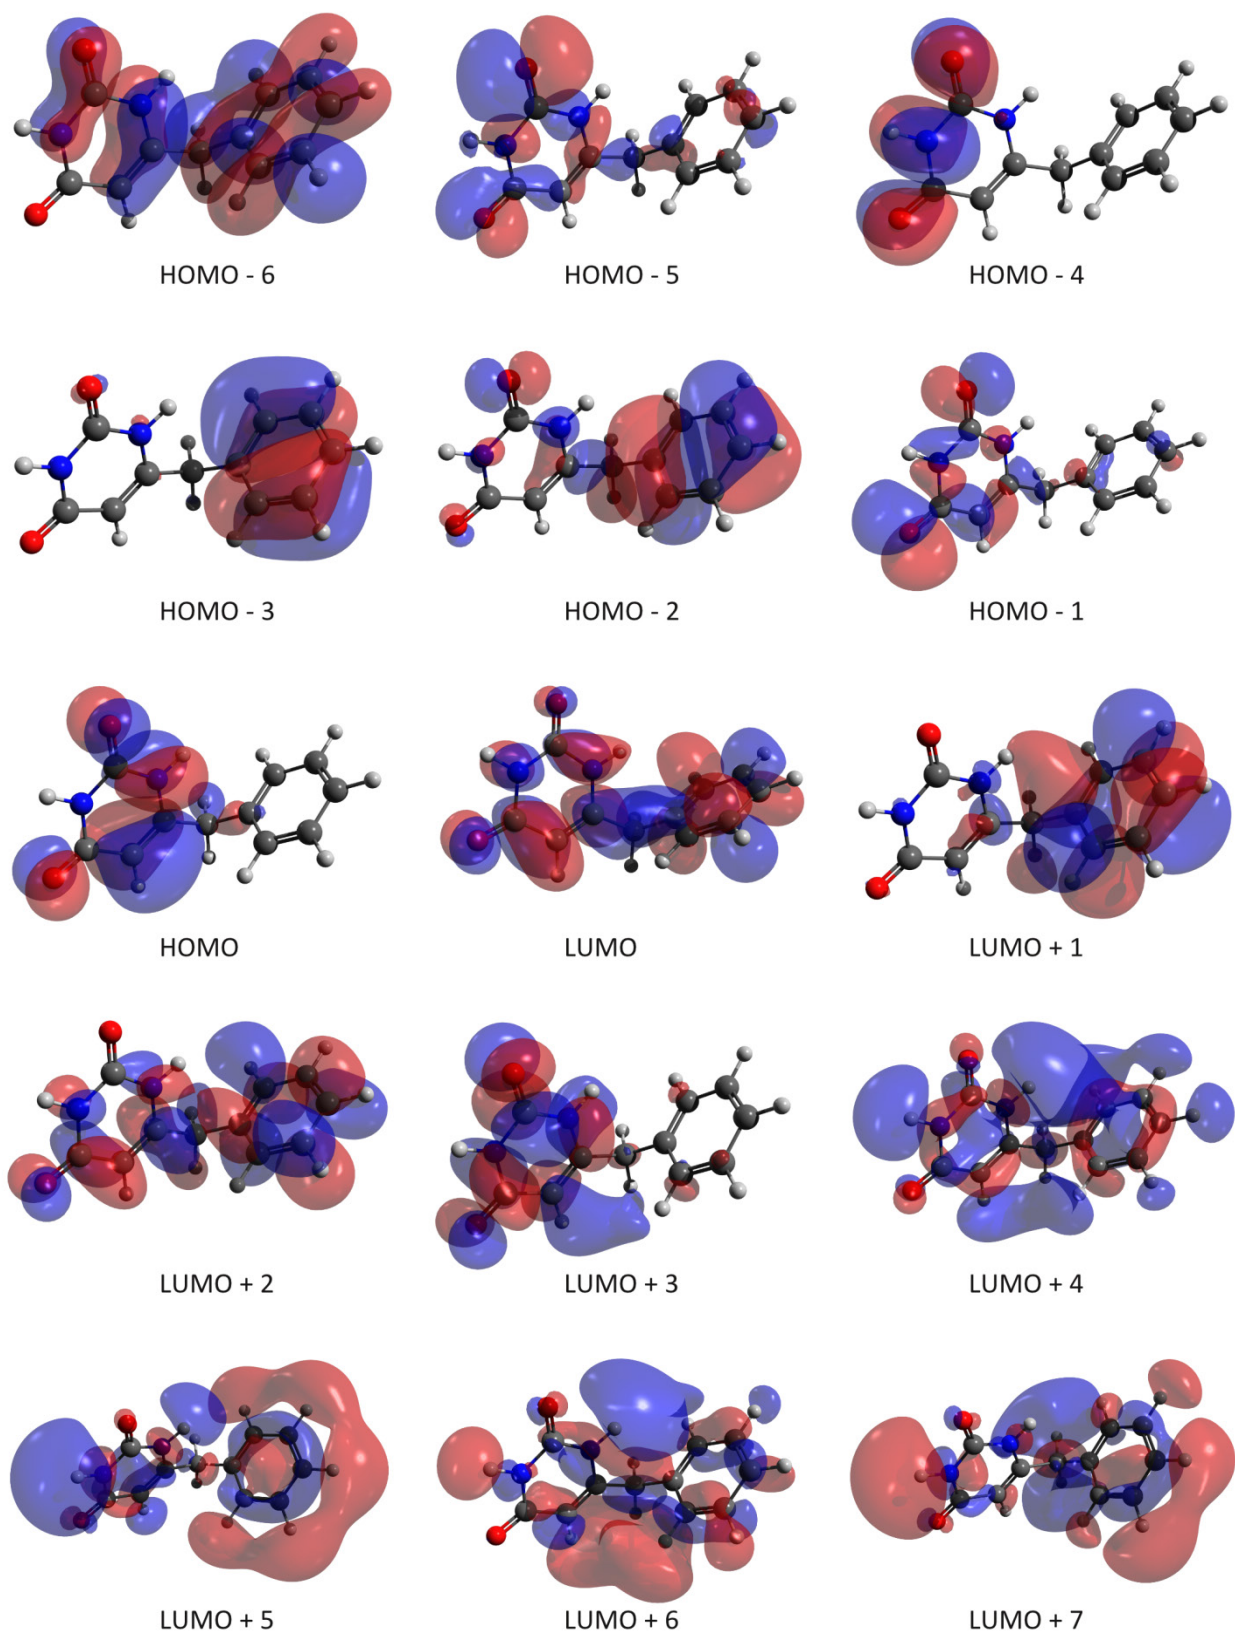

**Figure S3.** The orbital shapes of the last seven occupied and first eight unoccupied orbitals of the 6BU system.

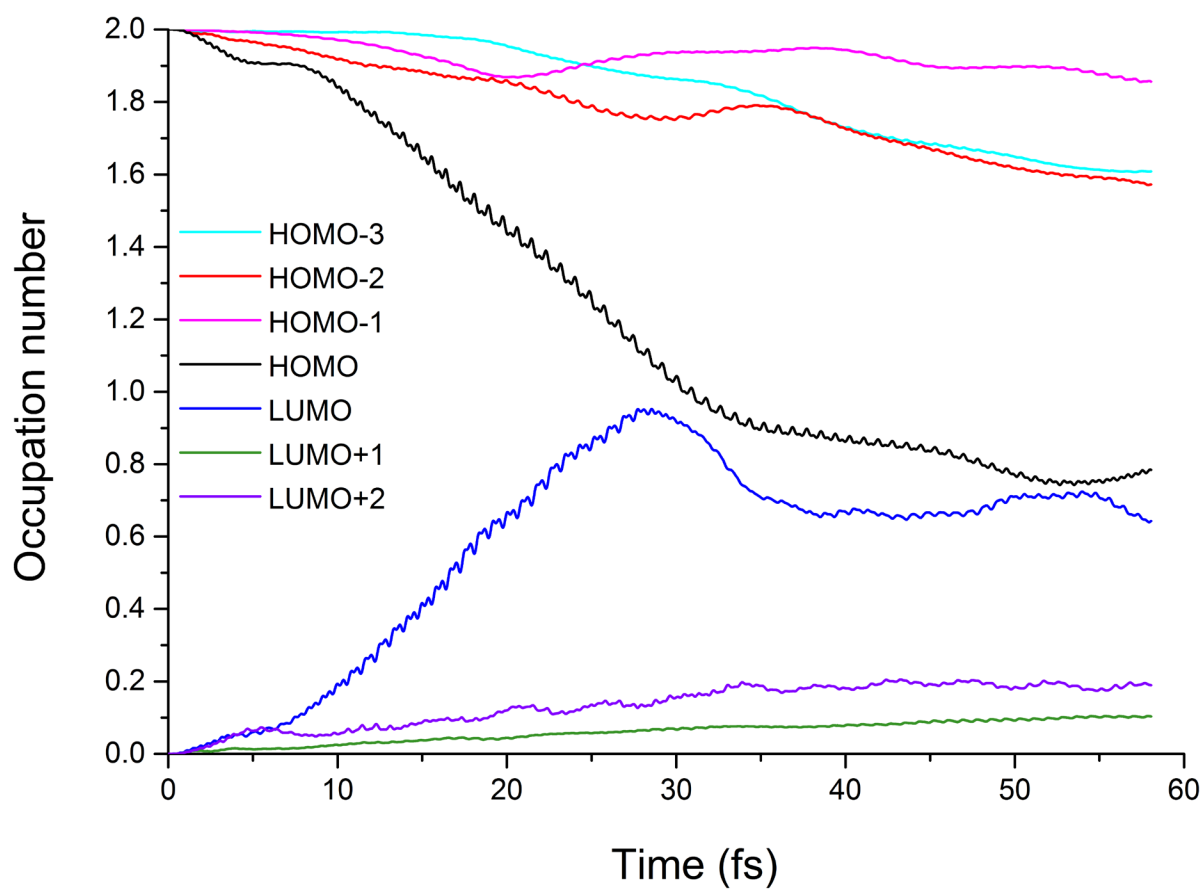

**Figure S4.** From HOMO-3 to HOMO occupied and from LUMO to LUMO+2 virtual orbital's population induced by a laser field applied in the Z directions with 60 fs pulse duration in the case of 6BU system.

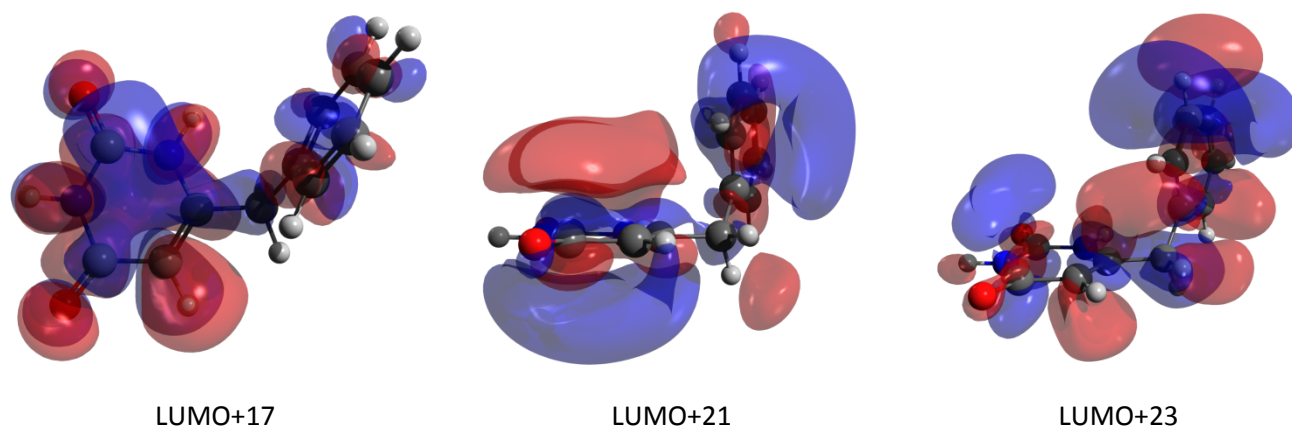

**Figure S5.** The orbital shapes of the 18<sup>th</sup>, 22<sup>nd</sup> and 24<sup>th</sup> unoccupied orbitals of the 6BU system.



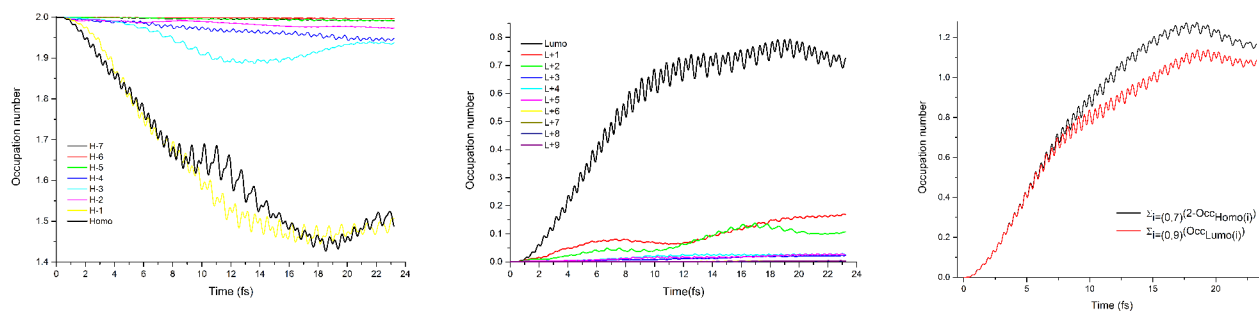

**Figure S6.** The HOMO, LUMO as well as the total occupied orbital depopulation and the total virtual orbital occupation of 5BU for a laser field in YZ direction.

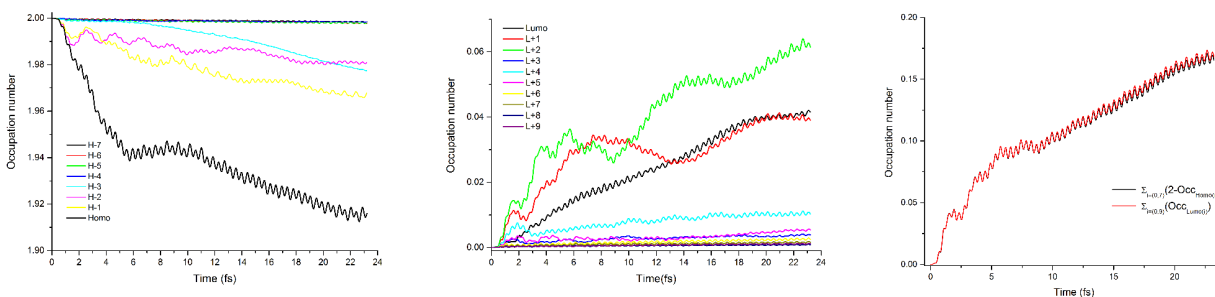

**Figure S7.** The HOMO, LUMO as well as the total occupied orbital depopulation and the total virtual orbital occupation of 5BU for a laser field in -YZ direction.

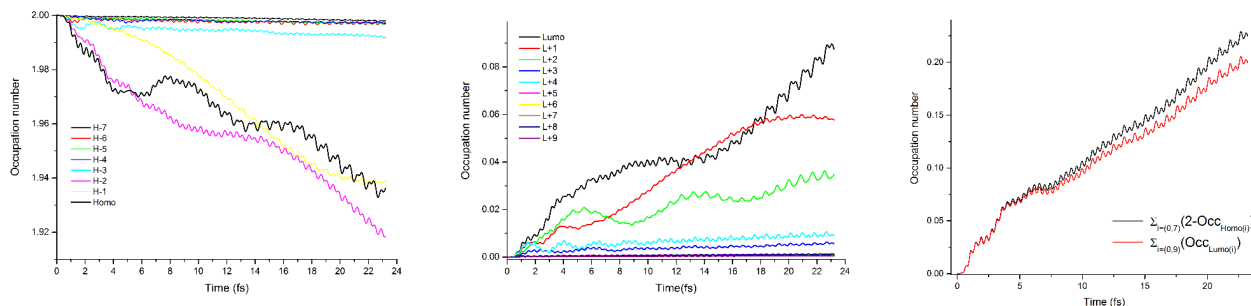

**Figure S8.** The HOMO, LUMO as well as the total occupied orbital depopulation and the total virtual orbital occupation of 6BU for a laser field in YZ direction.

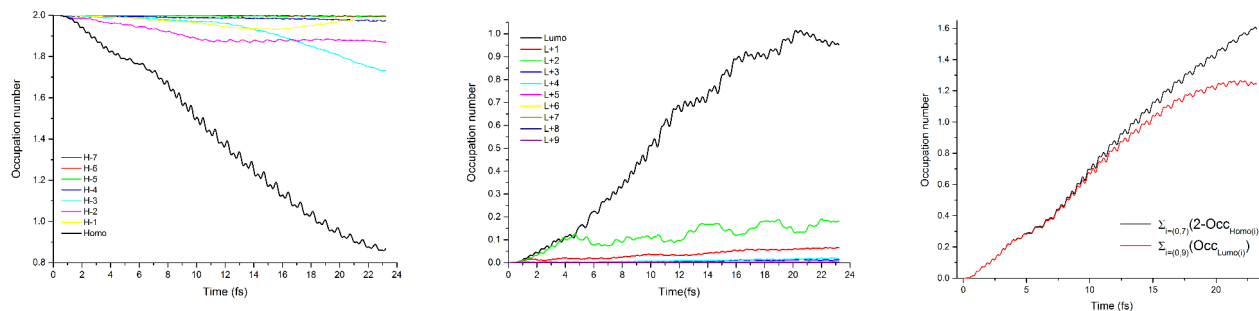

**Figure S9.** The HOMO, LUMO as well as the total occupied orbital depopulation and the total virtual orbital occupation of 6BU for a laser field in -YZ direction.

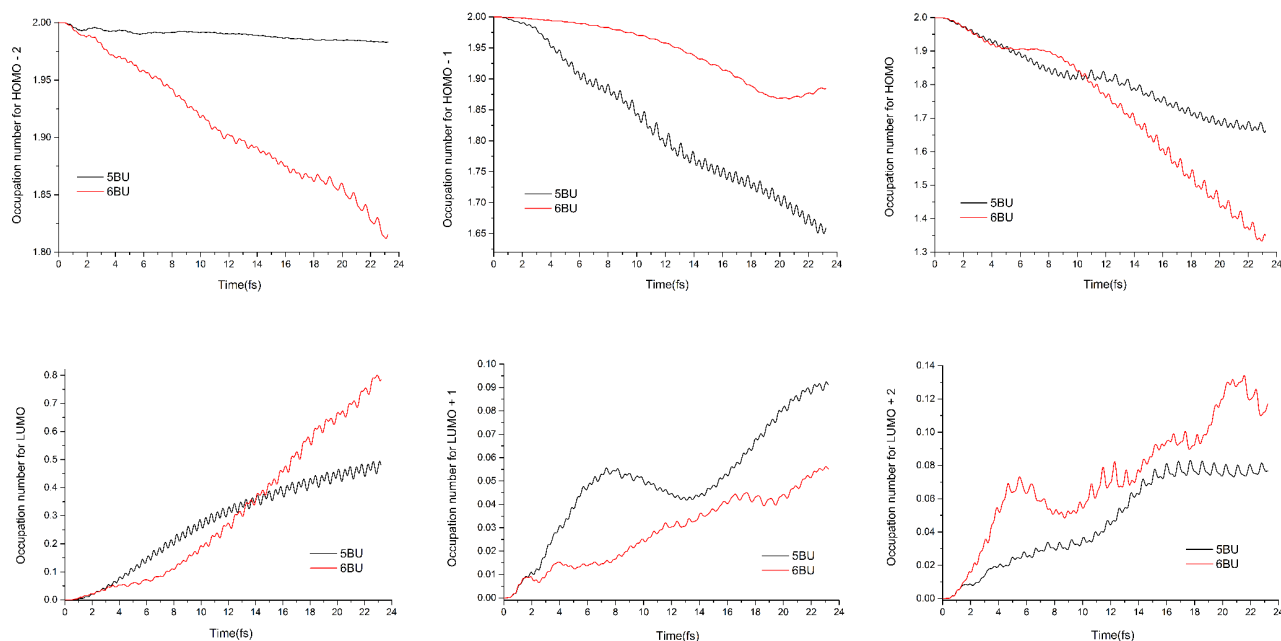

**Figure S10.** The HOMO - 2, HOMO - 1, HOMO, LUMO, LUMO + 1 and LUMO + 2 orbital population for 5BU and 6BU molecular systems.

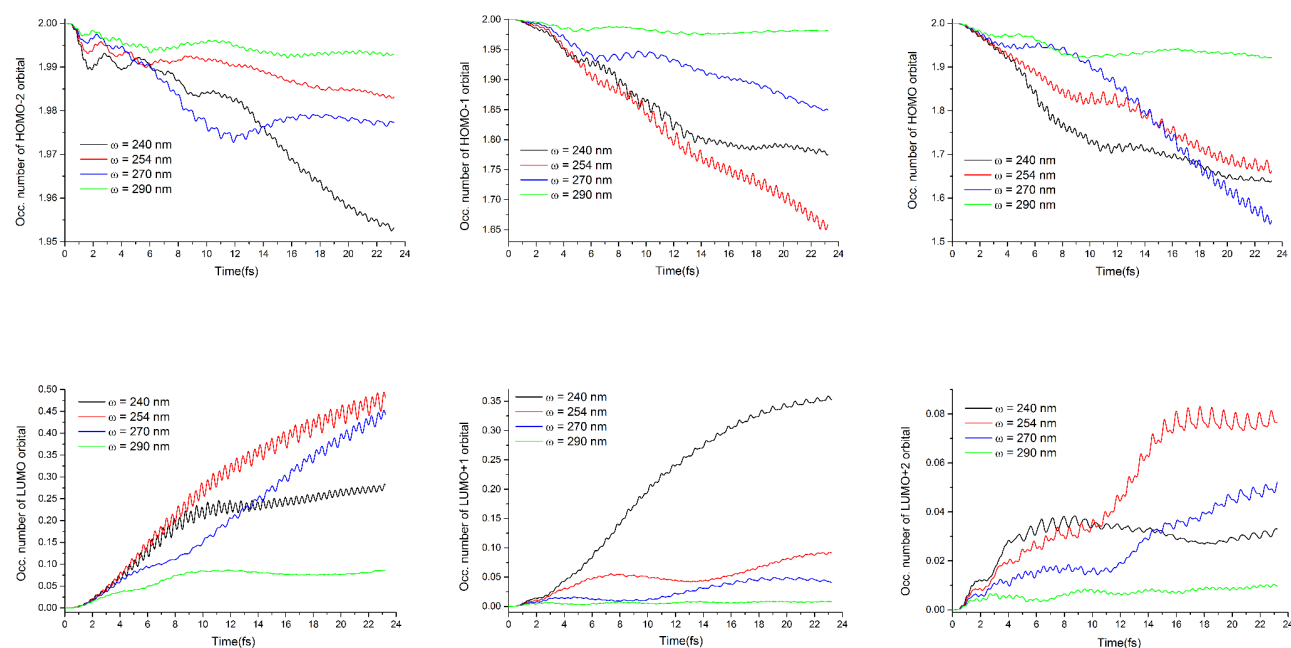

**Figure S11.** The HOMO - 2, HOMO - 1, HOMO, LUMO, LUMO + 1 and LUMO + 2 orbital populations for 5BU molecular system using four different (240 nm, 254 nm, 270 nm and 290 nm) laser frequencies in the direction of Z axis.

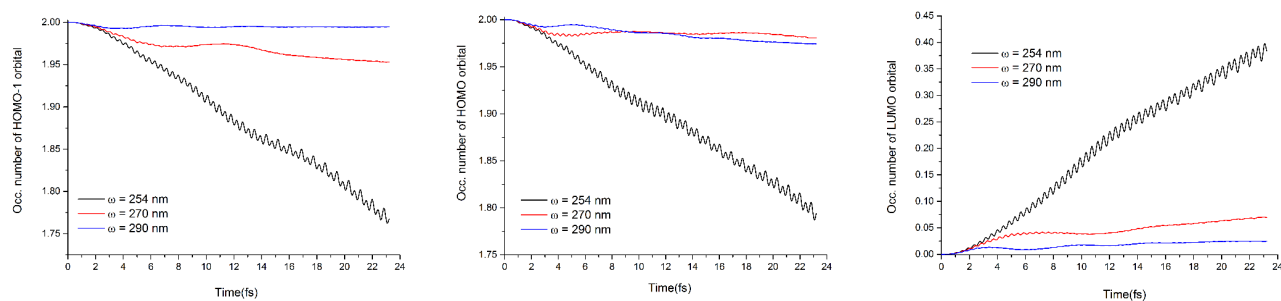

**Figure S12.** The HOMO - 1, HOMO, LUMO orbital populations for 5BU molecular system using four different (254 nm, 270 nm and 290 nm) laser frequencies in the direction of Y axis.

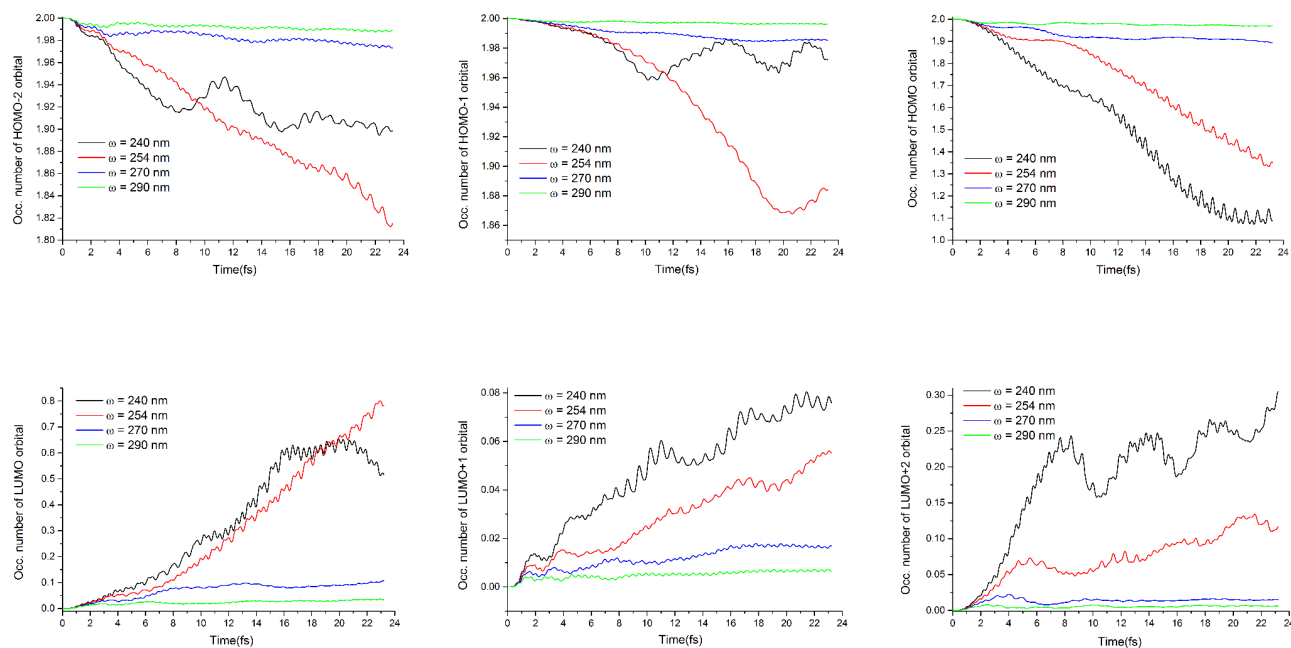

**Figure S13.** The HOMO - 2, HOMO - 1, HOMO, LUMO, LUMO + 1 and LUMO + 2 orbital populations for 6BU molecular system using four different (240 nm, 254 nm, 270 nm and 290 nm) laser frequencies in the direction of Z axis.



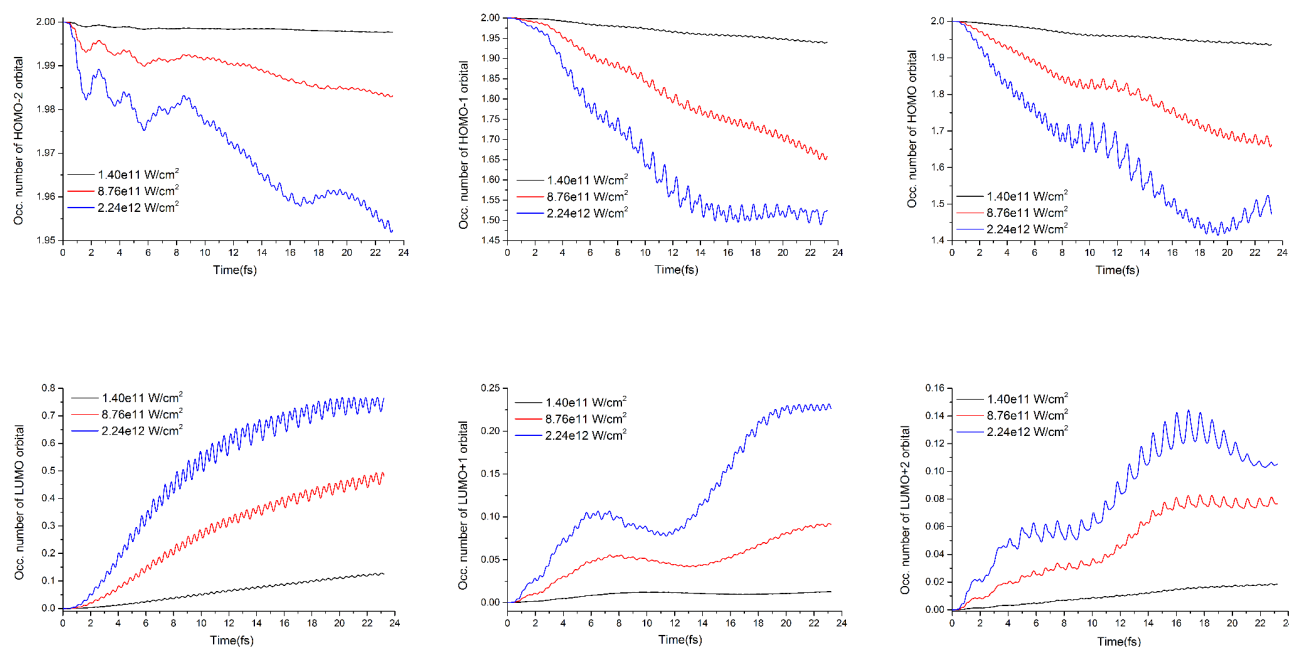

**Figure S14.** The HOMO - 2, HOMO - 1, HOMO, LUMO, LUMO + 1 and LUMO + 2 orbital populations for 5BU molecular system using three different ( $1.40 \times 10^{11} \text{ W/cm}^2$ ,  $8.76 \times 10^{11} \text{ W/cm}^2$  and  $2.24 \times 10^{12} \text{ W/cm}^2$ ) laser intensities in the direction of Z axis.

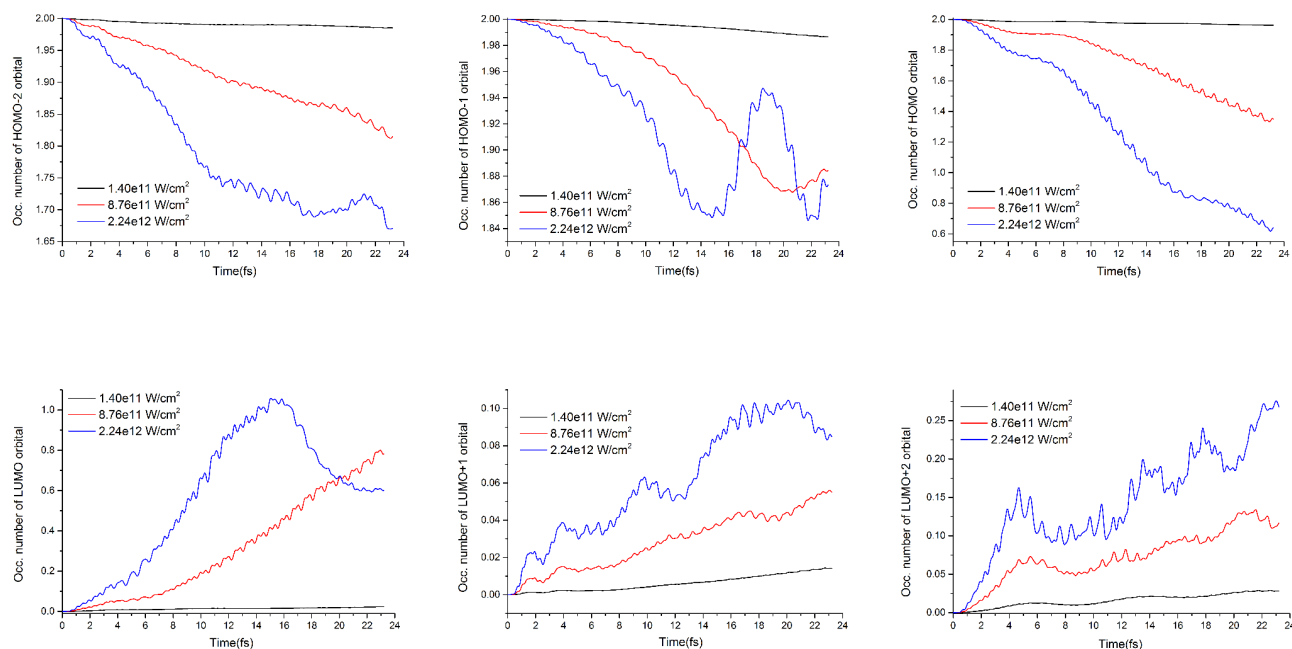

**Figure S15.** The HOMO - 2, HOMO - 1, HOMO, LUMO, LUMO + 1 and LUMO + 2 orbital populations for 6BU molecular system using three different ( $1.40 \times 10^{11} \text{ W/cm}^2$ ,  $8.76 \times 10^{11} \text{ W/cm}^2$  and  $2.24 \times 10^{12} \text{ W/cm}^2$ ) laser intensities in the direction of Z axis.
